# Supplementary material for: The economic burden of dementia in low- and middle-income countries (LMICs): a systematic review
Source: PubMed Central journal article supplement (PMC8981345; doi:10.1136/bmjgh-2021-007409), 2022-04-03
Supplement: bmjgh-2021-007409supp001.pdf [file bmjgh-2021-007409supp001.pdf]

Economic burden of dementia in low- and middle- income countries (LMICs): A systematic review.

## Appendix

### Search strategy

MEDLINE/PUBMED

Filter: Humans

### Keywords

#### Dementia or Alzheimer<sup>1</sup>

((("dementia"[MeSH Terms] OR "dementia"[All Fields] OR "dementias"[All Fields] OR "dementia s"[All Fields]) OR ((((((("alzheimer s"[All Fields] OR "alzheimer disease"[MeSH Terms]) OR ("alzheimer"[All Fields] AND "disease"[All Fields])) OR "alzheimer disease"[All Fields] OR "alzheimer"[All Fields] OR "alzheimers"[All Fields] OR "alzheimer s"[All Fields] OR "alzheimers s"[All Fields])

AND

#### Cost-of-illness<sup>2</sup>

"forecasting"[MeSH Terms] OR "health expenditures"[MeSH Terms] OR "spending"[Title/Abstract] OR "costs and cost analysis"[MeSH Terms] OR "cost-of-illness"[Title/Abstract] OR "cost-of-illness"[Title/Abstract]

<sup>1</sup>We follow the keywords used in Killin et al. (2016), Environmental risk factors for dementia: a systematic review. *BMC Geriatrics*, 16(1), 175.

<sup>2</sup>We follow the keywords used in Wang et al. (2018), A Systematic Review of Cost-of-Illness Studies of Multimorbidity. *Appl Health Econ Health Policy*, 16(1), 15-29.

AND

#### Low- and middle- income countries (LMICs)

Using EPOC LMIC filter 2020\_v3 #1a OR #2 <https://epoc.cochrane.org/lmic-filters>

#1a

afghanistan[MeSH] OR albania[MeSH] OR algeria[MeSH] OR american samoa[MeSH] OR angola[MeSH] OR antigua and barbuda[MeSH] OR argentina[MeSH] OR armenia[MeSH] OR aruba[MeSH] OR azerbaijan[MeSH] OR bahrain[MeSH] OR bangladesh[MeSH] OR

barbados[MeSH] OR republic of belarus[MeSH] OR belize[MeSH] OR benin[MeSH] OR bhutan[MeSH] OR bolivia[MeSH] OR bosnia and herzegovina[MeSH] OR botswana[MeSH] OR brazil[MeSH] OR bulgaria[MeSH] OR burkina faso[MeSH] OR burundi[MeSH] OR cabo verde[MeSH] OR cambodia[MeSH] OR cameroon[MeSH] OR central african republic[MeSH] OR chad[MeSH] OR chile[MeSH] OR china[MeSH] OR colombia[MeSH] OR comoros[MeSH] OR democratic republic of the congo[MeSH] OR congo[MeSH] OR costa rica[MeSH] OR cote d'ivoire[MeSH] OR croatia[MeSH] OR cuba[MeSH] OR cyprus[MeSH] OR czech republic[MeSH] OR djibouti[MeSH] OR dominica[MeSH] OR dominican republic[MeSH] OR ecuador[MeSH] OR egypt[MeSH] OR el salvador[MeSH] OR equatorial guinea[MeSH] OR eritrea[MeSH] OR estonia[MeSH] OR swaziland[MeSH] OR ethiopia[MeSH] OR fiji[MeSH] OR gabon[MeSH] OR gambia[MeSH] OR georgia (republic)[MeSH] OR ghana[MeSH] OR gibraltar[MeSH] OR greece[MeSH] OR grenada[MeSH] OR guam[MeSH] OR guatemala[MeSH] OR guinea[MeSH] OR guinea bissau[MeSH] OR guyana[MeSH] OR haiti[MeSH] OR honduras[MeSH] OR hungary[MeSH] OR india[MeSH] OR indonesia[MeSH] OR iran[MeSH] OR iraq[MeSH] OR jamaica[MeSH] OR jordan[MeSH] OR kazakhstan[MeSH] OR kenya[MeSH] OR democratic people's republic of korea[MeSH] OR republic of korea[MeSH] OR kosovo[MeSH] OR kyrgyzstan[MeSH] OR laos[MeSH] OR latvia[MeSH] OR lebanon[MeSH] OR lesotho[MeSH] OR liberia[MeSH] OR libya[MeSH] OR lithuania[MeSH] OR macau[MeSH] OR macedonia (republic)[MeSH] OR madagascar[MeSH] OR malawi[MeSH] OR malaysia[MeSH] OR indian ocean islands[MeSH] OR mali[MeSH] OR malta[MeSH] OR micronesia[MeSH] OR palau[MeSH] OR mauritania[MeSH] OR mauritius[MeSH] OR mexico[MeSH] OR moldova[MeSH] OR mongolia[MeSH] OR montenegro[MeSH] OR morocco[MeSH] OR mozambique[MeSH] OR myanmar[MeSH] OR namibia[MeSH] OR nepal[MeSH] OR netherlands antilles[MeSH] OR nicaragua[MeSH] OR niger[MeSH] OR nigeria[MeSH] OR oman[MeSH] OR pakistan[MeSH] OR panama[MeSH] OR papua new guinea[MeSH] OR paraguay[MeSH] OR peru[MeSH] OR philippines[MeSH] OR poland[MeSH] OR portugal[MeSH] OR puerto rico[MeSH] OR romania[MeSH] OR russia[MeSH] OR rwanda[MeSH] OR samoa[MeSH] OR sao tome and principe[MeSH] OR saudi arabia[MeSH] OR senegal[MeSH] OR serbia[MeSH] OR seychelles[MeSH] OR sierra leone[MeSH] OR slovakia[MeSH] OR slovenia[MeSH] OR melanesia[MeSH] OR somalia[MeSH] OR south africa[MeSH] OR south sudan[MeSH] OR sri lanka[MeSH] OR saint kitts and nevis[MeSH] OR saint lucia[MeSH] OR saint vincent and the grenadines[MeSH] OR sudan[MeSH] OR suriname[MeSH] OR syria[MeSH] OR tajikistan[MeSH] OR tanzania[MeSH] OR thailand[MeSH] OR timor leste[MeSH] OR togo[MeSH] OR tonga[MeSH] OR trinidad and tobago[MeSH] OR tunisia[MeSH] OR turkey (republic)[MeSH] OR turkmenistan[MeSH] OR uganda[MeSH] OR ukraine[MeSH] OR uruguay[MeSH] OR uzbekistan[MeSH] OR vanuatu[MeSH] OR venezuela[MeSH] OR vietnam[MeSH] OR middle east[MeSH] OR yemen[MeSH] OR yugoslavia[MeSH] OR zambia[MeSH] OR zimbabwe[MeSH] OR africa south of the sahara[MeSH] OR africa, central[MeSH] OR africa, northern[MeSH] OR africa, southern[MeSH] OR africa, eastern[MeSH] OR africa, western[MeSH] OR west indies[MeSH] OR indian ocean islands[MeSH] OR caribbean region[MeSH] OR central america[MeSH] OR latin america[MeSH] OR south america[MeSH] OR asia, central[MeSH] OR asia, northern[MeSH] OR asia, southeastern[MeSH] OR asia, western[MeSH] OR europe, eastern[MeSH] OR developing countries[MeSH]

OR

#2

afghanistan[Text Word] OR albania[Text Word] OR algeria[Text Word] OR american  
samoa[Text Word] OR angola[Text Word] OR antigua[Text Word] OR barbuda[Text Word]  
OR argentina[Text Word] OR armenia[Text Word] OR armenian[Text Word] OR aruba[Text  
Word] OR azerbaijan[Text Word] OR bahrain[Text Word] OR bangladesh[Text Word] OR  
barbados[Text Word] OR belarus[Text Word] OR byelarus[Text Word] OR belorussia[Text  
Word] OR byelorussian[Text Word] OR belize[Text Word] OR british honduras[Text Word]  
OR benin[Text Word] OR dahomey[Text Word] OR bhutan[Text Word] OR bolivia[Text  
Word] OR bosnia[Text Word] OR herzegovina[Text Word] OR botswana[Text Word] OR  
bechuanaland[Text Word] OR brazil[Text Word] OR brasil[Text Word] OR bulgaria[Text  
Word] OR burkina faso[Text Word] OR burkina fasso[Text Word] OR upper volta[Text  
Word] OR burundi[Text Word] OR urundi[Text Word] OR cabo verde[Text Word] OR cape  
verde[Text Word] OR cambodia[Text Word] OR kampuchea[Text Word] OR khmer  
republic[Text Word] OR cameroon[Text Word] OR cameron[Text Word] OR cameroun[Text  
Word] OR central african republic[Text Word] OR ubangi shari[Text Word] OR chad[Text  
Word] OR chile[Text Word] OR china[Text Word] OR colombia[Text Word] OR  
comoros[Text Word] OR comoro islands[Text Word] OR mayotte[Text Word] OR  
congo[Text Word] OR zaire[Text Word] OR costa rica[Text Word] OR cote d'ivoire[Text  
Word] OR cote d'ivoire[Text Word] OR cote d'ivoire[Text Word] OR ivory coast[Text Word]  
OR croatia[Text Word] OR cuba[Text Word] OR cyprus[Text Word] OR czech republic[Text  
Word] OR czechoslovakia[Text Word] OR djibouti[Text Word] OR french somaliland[Text  
Word] OR dominica[Text Word] OR dominican republic[Text Word] OR ecuador[Text  
Word] OR egypt[Text Word] OR united arab republic[Text Word] OR el salvador[Text  
Word] OR equatorial guinea[Text Word] OR spanish guinea[Text Word] OR eritrea[Text  
Word] OR estonia[Text Word] OR eswatini[Text Word] OR swaziland[Text Word] OR  
ethiopia[Text Word] OR fiji[Text Word] OR gabon[Text Word] OR gabonese republic[Text  
Word] OR gambia[Text Word] OR georgia[Text Word] OR georgian[Text Word] OR  
ghana[Text Word] OR gold coast[Text Word] OR gibraltar[Text Word] OR greece[Text  
Word] OR grenada[Text Word] OR guam[Text Word] OR guatemala[Text Word] OR  
guinea[Text Word] OR guyana[Text Word] OR guiana[Text Word] OR haiti[Text Word] OR  
hispaniola[Text Word] OR honduras[Text Word] OR hungary[Text Word] OR india[Text  
Word] OR indonesia[Text Word] OR timor[Text Word] OR iran[Text Word] OR iraq[Text  
Word] OR isle of man[Text Word] OR jamaica[Text Word] OR jordan[Text Word] OR

kazakhstan[Text Word] OR kazakh[Text Word] OR kenya[Text Word] OR korea[Text Word] OR kosovo[Text Word] OR kyrgyzstan[Text Word] OR kirghizia[Text Word] OR kirgizstan[Text Word] OR kyrgyz republic[Text Word] OR kirghiz[Text Word] OR laos[Text Word] OR lao pdr[Text Word] OR lao people's democratic republic[Text Word] OR latvia[Text Word] OR lebanon[Text Word] OR lesotho[Text Word] OR basutoland[Text Word] OR liberia[Text Word] OR libya[Text Word] OR libyan arab jamahiriya[Text Word] OR lithuania[Text Word] OR macau[Text Word] OR macao[Text Word] OR macedonia[Text Word] OR madagascar[Text Word] OR malagasy republic[Text Word] OR malawi[Text Word] OR nyasaland[Text Word] OR malaysia[Text Word] OR maldives[Text Word] OR indian ocean[Text Word] OR mali[Text Word] OR malta[Text Word] OR micronesia[Text Word] OR kiribati[Text Word] OR marshall islands[Text Word] OR nauru[Text Word] OR northern mariana islands[Text Word] OR palau[Text Word] OR tuvalu[Text Word] OR mauritania[Text Word] OR mauritius[Text Word] OR mexico[Text Word] OR moldova[Text Word] OR moldovian[Text Word] OR mongolia[Text Word] OR montenegro[Text Word] OR morocco[Text Word] OR ifni[Text Word] OR mozambique[Text Word] OR portuguese east africa[Text Word] OR myanmar[Text Word] OR burma[Text Word] OR namibia[Text Word] OR nepal[Text Word] OR netherlands antilles[Text Word] OR nicaragua[Text Word] OR niger[Text Word] OR nigeria[Text Word] OR oman[Text Word] OR muscat[Text Word] OR pakistan[Text Word] OR panama[Text Word] OR papua new guinea[Text Word] OR paraguay[Text Word] OR peru[Text Word] OR philippines[Text Word] OR philipines[Text Word] OR phillipines[Text Word] OR poland[Text Word] OR polish people's republic[Text Word] OR portugal[Text Word] OR portuguese republic[Text Word] OR puerto rico[Text Word] OR romania[Text Word] OR russia[Text Word] OR russian federation[Text Word] OR ussr[Text Word] OR soviet union[Text Word] OR union of soviet socialist republics[Text Word] OR rwanda[Text Word] OR ruanda[Text Word] OR samoa[Text Word] OR pacific islands[Text Word] OR polynesia[Text Word] OR samoan islands[Text Word] OR sao tome and principe[Text Word] OR saudi arabia[Text Word] OR senegal[Text Word] OR serbia[Text Word] OR seychelles[Text Word] OR sierra leone[Text Word] OR slovakia[Text Word] OR slovak republic[Text Word] OR slovenia[Text Word] OR melanesia[Text Word] OR solomon island[Text Word] OR solomon islands[Text Word] OR norfolk island[Text Word] OR somalia[Text Word] OR south africa[Text Word] OR south sudan[Text Word] OR sri lanka[Text Word] OR ceylon[Text Word] OR saint kitts and nevis[Text Word] OR st kitts and nevis[Text Word] OR saint lucia[Text Word] OR st lucia[Text Word] OR saint vincent[Text Word] OR st vincent[Text Word] OR grenadines[Text Word] OR sudan[Text Word] OR suriname[Text Word] OR surinam[Text

Word] OR syria[Text Word] OR syrian arab republic[Text Word] OR tajikistan[Text Word] OR tadjikistan[Text Word] OR tadjikistan[Text Word] OR tadjik[Text Word] OR tanzania[Text Word] OR tanganyika[Text Word] OR thailand[Text Word] OR siam[Text Word] OR timor leste[Text Word] OR east timor[Text Word] OR togo[Text Word] OR togolese republic[Text Word] OR tonga[Text Word] OR trinidad[Text Word] OR tobago[Text Word] OR tunisia[Text Word] OR turkey[Text Word] OR turkmenistan[Text Word] OR turkmen[Text Word] OR uganda[Text Word] OR ukraine[Text Word] OR uruguay[Text Word] OR uzbekistan[Text Word] OR uzbek[Text Word] OR vanuatu[Text Word] OR new hebrides[Text Word] OR venezuela[Text Word] OR vietnam[Text Word] OR viet nam[Text Word] OR middle east[Text Word] OR west bank[Text Word] OR gaza[Text Word] OR palestine[Text Word] OR yemen[Text Word] OR yugoslavia[Text Word] OR zambia[Text Word] OR zimbabwe[Text Word] OR northern rhodesia[Text Word] OR global south[Text Word] OR africa south of the sahara[Text Word] OR sub saharan africa[Text Word] OR subsaharan africa[Text Word] OR central africa[Text Word] OR north africa[Text Word] OR northern africa[Text Word] OR magreb[Text Word] OR maghrib[Text Word] OR sahara[Text Word] OR southern africa[Text Word] OR east africa[Text Word] OR eastern africa[Text Word] OR west africa[Text Word] OR western africa[Text Word] OR west indies[Text Word] OR indian ocean islands[Text Word] OR caribbean[Text Word] OR central america[Text Word] OR latin america[Text Word] OR south america[Text Word] OR central asia[Text Word] OR north asia[Text Word] OR northern asia[Text Word] OR southeastern asia[Text Word] OR south eastern asia[Text Word] OR southeast asia[Text Word] OR south east asia[Text Word] OR western asia[Text Word] OR east europe[Text Word] OR eastern europe[Text Word] OR developing country[Text Word] OR developing countries[Text Word] OR developing nation[Text Word] OR developing nations[Text Word] OR developing population[Text Word] OR developing populations[Text Word] OR developing world[Text Word] OR less developed country[Text Word] OR less developed countries[Text Word] OR less developed nation[Text Word] OR less developed nations[Text Word] OR less developed world[Text Word] OR lesser developed countries[Text Word] OR lesser developed nations[Text Word] OR under developed country[Text Word] OR under developed countries[Text Word] OR under developed nations[Text Word] OR under developed world[Text Word] OR underdeveloped country[Text Word] OR underdeveloped countries[Text Word] OR underdeveloped nation[Text Word] OR underdeveloped nations[Text Word] OR underdeveloped population[Text Word] OR underdeveloped populations[Text Word] OR underdeveloped world[Text Word] OR middle income country[Text Word] OR middle income countries[Text Word] OR middle income nation[Text

Word] OR middle income nations[Text Word] OR middle income population[Text Word] OR middle income populations[Text Word] OR low income country[Text Word] OR low income countries[Text Word] OR low income nation[Text Word] OR low income nations[Text Word] OR low income population[Text Word] OR low income populations[Text Word] OR lower income country[Text Word] OR lower income countries[Text Word] OR lower income nations[Text Word] OR lower income population[Text Word] OR lower income populations[Text Word] OR underserved countries[Text Word] OR underserved nations[Text Word] OR underserved population[Text Word] OR underserved populations[Text Word] OR under served population[Text Word] OR under served populations[Text Word] OR deprived countries[Text Word] OR deprived population[Text Word] OR deprived populations[Text Word] OR poor country[Text Word] OR poor countries[Text Word] OR poor nation[Text Word] OR poor nations[Text Word] OR poor population[Text Word] OR poor populations[Text Word] OR poor world[Text Word] OR poorer countries[Text Word] OR poorer nations[Text Word] OR poorer population[Text Word] OR poorer populations[Text Word] OR developing economy[Text Word] OR developing economies[Text Word] OR less developed economy[Text Word] OR less developed economies[Text Word] OR underdeveloped economies[Text Word] OR middle income economy[Text Word] OR middle income economies[Text Word] OR low income economy[Text Word] OR low income economies[Text Word] OR lower income economies[Text Word] OR low gdp[Text Word] OR low gnp[Text Word] OR low gross domestic[Text Word] OR low gross national[Text Word] OR lower gdp[Text Word] OR lower gross domestic[Text Word] OR lmic[Text Word] OR lmics[Text Word] OR third world[Text Word] OR lami country[Text Word] OR lami countries[Text Word] OR transitional country[Text Word] OR transitional countries[Text Word] OR emerging economies[Text Word] OR emerging nation[Text Word] OR emerging nations[Text Word]

**Table 1.** Risk of bias assessment based on Larg and Moss method.

| Question/Study                                                                                         | Aajami, 2019 | Allegri, 2007 | Custodio, 2015 | Ferretti, 2018 | Jia, 2018 | Keogh-Brown, 2015 | Kongpak wattana, 2019 | Koris, 2018 | Liu, 2013 | Mould-Quevedo, 2013 | Nur, 2017   | Prada, 2017 |
|--------------------------------------------------------------------------------------------------------|--------------|---------------|----------------|----------------|-----------|-------------------|-----------------------|-------------|-----------|---------------------|-------------|-------------|
| <b>1) Analytical framework: what costs should have been measured? (overall)</b>                        |              |               |                |                |           |                   |                       |             |           |                     |             |             |
| (a) What was the motivation and perspective of the study?                                              | Societal     | Societal      | HC payer       | Societal       | Societal  | Societal          | Societal              | Societal    | Societal  | HC payer            | HC Provider | HC provider |
| (b) Was the appropriate epidemiologic approach taken?                                                  |              |               |                |                |           |                   |                       |             |           |                     |             |             |
| (c) Was the study question well specified?                                                             |              |               |                |                |           |                   |                       |             |           |                     |             |             |
| (i) Were all relevant, non-trivial cost components and their stakeholders identified?                  |              |               |                |                |           |                   |                       |             |           |                     |             |             |
| (ii) Were necessary timeframes specified?                                                              |              |               |                |                |           |                   |                       |             |           |                     |             |             |
| (iii) Was a case of disease or risk factor adequately and appropriately defined?                       |              |               |                |                |           |                   |                       |             |           |                     |             |             |
| (iv) Was the counterfactual population occurrence plausible and meaningful?                            | NA           |               | NA             | NA             | NA        | NA                | NA                    |             |           | NA                  | NA          | NA          |
| <b>2) Methodology and data: how well were resource use and productivity losses measured? (overall)</b> |              |               |                |                |           |                   |                       |             |           |                     |             |             |
| (a) Was an appropriate method(s) of quantification used, such that                                     |              |               |                |                |           |                   |                       |             |           |                     |             |             |
| (i) additional, or excess costs were measured?                                                         |              |               |                |                |           |                   |                       |             |           |                     |             |             |
| (ii) only costs specific to (caused by) the health problem were included (confounders controlled)?     |              |               |                |                |           |                   |                       |             |           |                     |             |             |
| (iii) all important effects were captured?                                                             |              |               |                |                |           |                   |                       |             |           |                     |             |             |
| (iv) important differences across subpopulations were accounted for?                                   |              |               |                |                |           |                   |                       |             |           |                     |             |             |
| (v) the required level of detail could be provided?                                                    |              |               |                |                |           |                   |                       |             |           |                     |             |             |
| (b) Was the resource quantification method(s) well executed?                                           |              |               |                |                |           |                   |                       |             |           |                     |             |             |
| (i) For population-based studies, were cost allocation methods, data and assumptions valid?            |              |               |                |                |           |                   |                       |             |           |                     |             |             |
| (ii) For person-based studies, were appropriate statistical tests performed and reported?              |              |               |                |                |           |                   |                       |             |           |                     |             |             |
| (iii) Were data representative of the study population?                                                |              |               |                |                |           |                   |                       |             |           |                     |             |             |
| (iv) Were there any other relevant resource quantification issues? (blue=no, orange=yes)               |              |               |                |                |           |                   |                       |             |           |                     |             |             |
| (c) Were healthcare resources valued appropriately?                                                    |              |               |                |                |           |                   |                       |             |           |                     |             |             |
| (d) Was the approach for valuing production losses justified, and assumptions valid?                   |              |               |                |                |           |                   |                       |             |           |                     | NA          | NA          |
| (e) Was the inclusion of intangible (indirect) costs appropriate:                                      |              |               |                |                |           |                   |                       |             |           |                     | NA          | NA          |

| Question/Study                                                                                                                                                                           | Aajami, 2019 | Allegrì, 2007 | Custodio, 2015 | Ferretti, 2018 | Jia, 2018 | Keogh-Brown, 2015 | Kongpakwattana, 2019 | Koris, 2018 | Liu, 2013 | Mould-Quevedo, 2013 | Nur, 2017 | Prada, 2017 |
|------------------------------------------------------------------------------------------------------------------------------------------------------------------------------------------|--------------|---------------|----------------|----------------|-----------|-------------------|----------------------|-------------|-----------|---------------------|-----------|-------------|
| (i) Was double counting of mortality-related production losses avoided?                                                                                                                  | NA           | NA            | NA             | NA             | NA        |                   | NA                   | NA          | NA        | NA                  | NA        | NA          |
| (ii) Were losses valued appropriately, given the study's perspective?                                                                                                                    |              |               |                |                |           |                   |                      |             |           |                     | NA        |             |
| <b>3) Analysis and reporting (overall)</b>                                                                                                                                               |              |               |                |                |           |                   |                      |             |           |                     |           |             |
| (a) Did the analysis address the study question?                                                                                                                                         |              |               |                |                |           |                   |                      |             |           |                     |           |             |
| (b) Was a range of estimates presented?                                                                                                                                                  |              |               |                |                |           |                   |                      |             |           |                     |           |             |
| (c) Were the main uncertainties identified?                                                                                                                                              |              |               |                |                |           |                   |                      |             |           |                     |           |             |
| (d) Was a sensitivity analysis performed on:                                                                                                                                             |              |               |                |                |           |                   |                      |             |           |                     |           |             |
| (i) important (uncertain) parameter estimates?                                                                                                                                           |              |               |                |                |           |                   |                      |             |           |                     |           |             |
| (ii) key assumptions? (including the counterfactual)                                                                                                                                     |              |               |                |                |           |                   |                      |             |           |                     |           |             |
| (iii) point estimates? (based on confidence or credible intervals)                                                                                                                       |              |               |                |                |           |                   |                      |             |           |                     |           |             |
| (e) Was adequate documentation and justification given for cost components, data, and sources, assumptions and methods?                                                                  |              |               |                |                |           |                   |                      |             |           |                     |           |             |
| (f) Was uncertainty around the estimates and its implications adequately discussed?                                                                                                      |              |               |                |                |           |                   |                      |             |           |                     |           |             |
| (g) Were important limitations discussed regarding the cost components, data, assumptions and methods?                                                                                   |              |               |                |                |           |                   |                      |             |           |                     |           |             |
| (h) Were the results presented at the appropriate level of detail to answer the study question (cost components; disease subtypes, severity, stage; subpopulation groups, cost bearers)? |              |               |                |                |           |                   |                      |             |           |                     |           |             |

Blue box denotes the question/parameter was answered yes and appropriately.

Orange box denotes the question/parameter was answered no and not appropriately.

NA; Not applicable, HC: Healthcare



Continuation of Table 1...

| Question/Study                                                                                     | Prince,<br>2004 | Rao,<br>2013 | Rojas,<br>2011 | Wang,<br>2008 | Wimo,<br>2006 | Wimo,<br>2007 | Wimo,<br>2010 | Wimo,<br>2013 | Wimo,<br>2017 | Xu, 2017 | Yan,<br>2019 | Zencir,<br>2005 |
|----------------------------------------------------------------------------------------------------|-----------------|--------------|----------------|---------------|---------------|---------------|---------------|---------------|---------------|----------|--------------|-----------------|
| <b>1) Analytical framework: what costs should have been measured?</b>                              |                 |              |                |               |               |               |               |               |               |          |              |                 |
| (a) What was the motivation and perspective of the study?                                          | Societal        | Societal     | HC payer       | Societal      | HC payer      | Societal      | Societal      | Societal      | Societal      | Societal | Societal     | Societal        |
| (b) Was the appropriate epidemiologic approach taken?                                              |                 |              |                |               |               |               |               |               |               |          |              |                 |
| (c) Was the study question well specified?                                                         |                 |              |                |               |               |               |               |               |               |          |              |                 |
| (i) Were all relevant, non-trivial cost components and their stakeholders identified?              |                 |              |                |               |               |               |               |               |               |          |              |                 |
| (ii) Were necessary timeframes specified?                                                          |                 |              |                |               |               |               |               |               |               |          |              |                 |
| (iii) Was a case of disease or risk factor adequately and appropriately defined?                   |                 |              |                |               |               |               |               |               |               |          |              |                 |
| (iv) Was the counterfactual population occurrence plausible and meaningful?                        | NA              | NA           | NA             | NA            | NA            | NA            | NA            | NA            | NA            | NA       | NA           |                 |
| <b>2) Methodology and data: how well were resource use and productivity losses measured?</b>       |                 |              |                |               |               |               |               |               |               |          |              |                 |
| (a) Was an appropriate method(s) of quantification used, such that                                 |                 |              |                |               |               |               |               |               |               |          |              |                 |
| (i) additional, or excess, costs were measured?                                                    |                 |              |                |               |               |               |               |               |               |          |              |                 |
| (ii) only costs specific to (caused by) the health problem were included (confounders controlled)? |                 |              |                |               |               |               |               |               |               |          |              |                 |
| (iii) all important effects were captured?                                                         |                 |              |                |               |               |               |               |               |               |          |              |                 |
| (iv) important differences across subpopulations were accounted for?                               |                 |              |                |               |               |               |               |               |               |          |              |                 |
| (v) the required level of detail could be provided?                                                |                 |              |                |               |               |               |               |               |               |          |              |                 |
| (b) Was the resource quantification method(s) well executed?                                       |                 |              |                |               |               |               |               |               |               |          |              |                 |
| (i) For population-based studies, were cost allocation methods, data and assumptions valid?        |                 |              |                |               |               |               |               |               |               |          |              |                 |
| (ii) For person-based studies, were appropriate statistical tests performed and reported?          |                 |              |                |               |               |               |               |               |               |          |              |                 |
| (iii) Were data representative of the study population?                                            |                 |              |                |               |               |               |               |               |               |          |              |                 |
| (iv) Were there any other relevant resource quantification issues? (blue=no, orange=yes)           |                 |              |                |               |               |               |               |               |               |          |              |                 |
| (c) Were healthcare resources valued appropriately?                                                |                 |              |                |               |               |               |               |               |               |          |              |                 |
| (d) Was the approach for valuing production losses justified, and assumptions valid?               |                 |              | NA             |               | NA            |               |               |               |               |          |              |                 |
| (e) Was the inclusion of intangible (indirect) costs appropriate:                                  |                 |              | NA             |               | NA            |               |               |               |               |          |              |                 |
| (i) Was double counting of mortality-related production losses avoided?                            | NA              | NA           | NA             | NA            | NA            | NA            | NA            | NA            | NA            | NA       | NA           | NA              |
| (ii) Were losses valued appropriately, given the study's perspective?                              |                 |              | NA             |               | NA            |               |               |               |               |          |              |                 |

| Question/Study                                                                                                                                                                           | Prince, 2004 | Rao, 2013 | Rojas, 2011 | Wang, 2008 | Wimo, 2006 | Wimo, 2007 | Wimo, 2010 | Wimo, 2013 | Wimo, 2017 | Xu, 2017 | Yan, 2019 | Zencir, 2005 |
|------------------------------------------------------------------------------------------------------------------------------------------------------------------------------------------|--------------|-----------|-------------|------------|------------|------------|------------|------------|------------|----------|-----------|--------------|
| <b>3) Analysis and reporting (overall)</b>                                                                                                                                               |              |           |             |            |            |            |            |            |            |          |           |              |
| (a) Did the analysis address the study question?                                                                                                                                         |              |           |             |            |            |            |            |            |            |          |           |              |
| (b) Was a range of estimates presented?                                                                                                                                                  |              |           |             |            |            |            |            |            |            |          |           |              |
| (c) Were the main uncertainties identified?                                                                                                                                              |              |           |             |            |            |            |            |            |            |          |           |              |
| (d) Was a sensitivity analysis performed on:                                                                                                                                             |              |           |             |            |            |            |            |            |            |          |           |              |
| (i) important (uncertain) parameter estimates?                                                                                                                                           |              |           |             |            |            |            |            |            |            |          |           |              |
| (ii) key assumptions? (including the counterfactual)                                                                                                                                     |              |           |             |            |            |            |            |            |            |          |           |              |
| (iii) point estimates? (based on confidence or credible intervals)                                                                                                                       |              |           |             |            |            |            |            |            |            |          |           |              |
| (e) Was adequate documentation and justification given for cost components, data and sources, assumptions and methods?                                                                   |              |           |             |            |            |            |            |            |            |          |           |              |
| (f) Was uncertainty around the estimates and its implications adequately discussed?                                                                                                      |              |           |             |            |            |            |            |            |            |          |           |              |
| (g) Were important limitations discussed regarding the cost components, data, assumptions and methods?                                                                                   |              |           |             |            |            |            |            |            |            |          |           |              |
| (h) Were the results presented at the appropriate level of detail to answer the study question (cost components; disease subtypes, severity, stage; subpopulation groups, cost bearers)? |              |           |             |            |            |            |            |            |            |          |           |              |

Blue box denotes the question/parameter was answered yes and appropriately.

Orange box denotes the question/parameter was answered no and not appropriately.

NA; Not applicable, HC: Healthcare

**Table 2.** List of sources for the missing information to inflate national level data and obtaining cost of dementia as % of GDP.

| Country                 | Missing data            | Sources                                                                                                                                                                                                                                                                                                                                                            |
|-------------------------|-------------------------|--------------------------------------------------------------------------------------------------------------------------------------------------------------------------------------------------------------------------------------------------------------------------------------------------------------------------------------------------------------------|
| Argentina               | CPI                     | <a href="https://ycharts.com/indicators/argentina_consumer_price_index_wdi">https://ycharts.com/indicators/argentina_consumer_price_index_wdi</a>                                                                                                                                                                                                                  |
| Cambodia                | CPI                     | World Bank 2018 CPI                                                                                                                                                                                                                                                                                                                                                |
| Central Africa Republic | CPI                     | Chad's 2009 CPI (neighbouring country with the same World Bank's LMICs grouping)                                                                                                                                                                                                                                                                                   |
| Comoros                 | CPI                     | World Bank 2013 CPI                                                                                                                                                                                                                                                                                                                                                |
| Congo                   | CPI                     | World Bank 2016 CPI                                                                                                                                                                                                                                                                                                                                                |
| Cuba                    | Exchange rate           | <a href="https://www.statista.com/outlook/998/203/economy/cuba#market-ExchangeRate">https://www.statista.com/outlook/998/203/economy/cuba#market-ExchangeRate</a>                                                                                                                                                                                                  |
| Eriteria                | CPI                     | Ethiopia's CPI (neighbouring country with the same World Bank's LMICs grouping)                                                                                                                                                                                                                                                                                    |
| Gaza Strip              | Exchange rate           | Israel shekel World Bank                                                                                                                                                                                                                                                                                                                                           |
| Libya                   | CPI                     | <a href="https://tradingeconomics.com/libya/consumer-price-index-cpi">https://tradingeconomics.com/libya/consumer-price-index-cpi</a>                                                                                                                                                                                                                              |
| Melanesia               | CPI, Exchange rate, GDP | 5 countries grouped under Melanesia: Fiji, Vanuatu, Solomon Islands, Papua New Guinea, New Caledonia, West New Guinea (Indonesia). Only New Caledonia a high-income country. We divide the cost report by the ratio of population reported by the countries, inflated the cost data and only took the average cost dementia as % GDP excluding New Caledonia data. |
| North Korea             | GDP                     | <a href="http://data.un.org/CountryProfile.aspx/_Images/CountryProfile.aspx?crName=Democratic%20People%27s%20Republic%20of%20Korea">http://data.un.org/CountryProfile.aspx/_Images/CountryProfile.aspx?crName=Democratic%20People%27s%20Republic%20of%20Korea</a>                                                                                                  |
| North Korea             | Exchange rate           | Frank, R. (2010). North Korea in 2009: Domestic Developments and the Economy. In <i>Korea 2010</i> (pp. 29-53). Brill.                                                                                                                                                                                                                                             |
| North Korea             | CPI                     | No available data on CPI from North Korea, as the country's is practising closed economy and their economic practice are different than other country even in the same LMICs group, therefore we did not inflate them using the CPI inflation ratio.                                                                                                               |
| Somalia                 | CPI                     | <a href="https://www.afdb.org/fr/documents/somalia-consumer-price-index-december-2019">https://www.afdb.org/fr/documents/somalia-consumer-price-index-december-2019</a>                                                                                                                                                                                            |
| Somalia                 | GDP                     | <a href="https://tradingeconomics.com/somalia/gdp">https://tradingeconomics.com/somalia/gdp</a> GDP                                                                                                                                                                                                                                                                |
| Syria                   | CPI                     | World Bank 2012 CPI                                                                                                                                                                                                                                                                                                                                                |
| Syria                   | Exchange rate           | <a href="https://www.ceicdata.com/en/syria/foreign-Exchange-rates/Exchange-rate-2019">https://www.ceicdata.com/en/syria/foreign-Exchange-rates/Exchange-rate-2019</a>                                                                                                                                                                                              |
| Syria                   | GDP                     | <a href="https://tradingeconomics.com/syria/gdp">https://tradingeconomics.com/syria/gdp</a> 2019 GDP                                                                                                                                                                                                                                                               |
| Timor Leste             | CPI                     | World Bank 2018 CPI                                                                                                                                                                                                                                                                                                                                                |
| Turkmenistan            | Exchange rate, CPI      | Iran's Exchange rate and CPI (neighbouring country with the same World Bank's LMICs grouping)                                                                                                                                                                                                                                                                      |
| Uzbekistan              | CPI                     | <a href="https://www.indexmundi.com/uzbekistan/inflation_rate_(consumer_prices).html">https://www.indexmundi.com/uzbekistan/inflation_rate_(consumer_prices).html</a>                                                                                                                                                                                              |
| Uzbekistan              | Exchange rate           | <a href="https://fred.stlouisfed.org/series/FXRATEUZA618NUPN">https://fred.stlouisfed.org/series/FXRATEUZA618NUPN</a>                                                                                                                                                                                                                                              |
| Venezuela               | CPI                     | <a href="https://ycharts.com/indicators/venezuela_consumer_price_index_wdi">https://ycharts.com/indicators/venezuela_consumer_price_index_wdi</a>                                                                                                                                                                                                                  |
| Western Sahara          | Exchange rate           | Morocco's data (Western Sahara is a disputed area, they use Morocco's currency)                                                                                                                                                                                                                                                                                    |

|                |               |                                                                                                                                                                                                    |
|----------------|---------------|----------------------------------------------------------------------------------------------------------------------------------------------------------------------------------------------------|
| Western Sahara | CPI           | Morocco's data (Western Sahara is a disputed area, they use Morocco's currency)                                                                                                                    |
| Western Sahara | GDP           | Morocco's data (Western Sahara is a disputed area, they use Morocco's currency)                                                                                                                    |
| Western Sahara | Population    | <a href="http://data.un.org/CountryProfile.aspx/Images/CountryProfile.aspx?crName=Western%20Sahara">http://data.un.org/CountryProfile.aspx/ Images/CountryProfile.aspx?crName=Western%20Sahara</a> |
| Yemen          | CPI           | World Bank 2014 CPI                                                                                                                                                                                |
| Zimbabwe       | Exchange rate | <a href="https://knoema.com/atlas/Zimbabwe/topics/Economy/Short-term-indicators/Exchange-rate">https://knoema.com/atlas/Zimbabwe/topics/Economy/Short-term-indicators/Exchange-rate</a>            |

**Table 3.** Direct cost components

| Author, year         | Country                                                                                                                        | Medications (general)/ drugs | Hospital stays/ inpatient | Outpatient visits/ consultation/ emergency | Diagnostic, examination, and tests | Rehabilitation/ physical therapy | out-of-pocket | Other components                                                                                                      |
|----------------------|--------------------------------------------------------------------------------------------------------------------------------|------------------------------|---------------------------|--------------------------------------------|------------------------------------|----------------------------------|---------------|-----------------------------------------------------------------------------------------------------------------------|
| Aajami, 2019         | Iran                                                                                                                           | ✓                            | ✗                         | ✓                                          | ✓                                  | ✓                                | ✗             |                                                                                                                       |
| Allegri, 2007        | Argentina                                                                                                                      | ✓                            | ✓                         | ✓                                          | ✗                                  | ✗                                | ✗             | Ancillary studies                                                                                                     |
| Custodio, 2015       | Peru                                                                                                                           | ✓                            | ✗                         | ✓                                          | ✓                                  | ✗                                | ✗             | Antipsychotic drugs                                                                                                   |
| Ferreti, 2018        | Brazil                                                                                                                         | ✓                            | ✓                         | ✓                                          | ✗                                  | ✗                                | ✗             |                                                                                                                       |
| Jia, 2018            | China                                                                                                                          | ✓                            | ✓                         | ✓                                          | ✗                                  | ✗                                | ✗             |                                                                                                                       |
| Keogh-Brown, 2015    | China                                                                                                                          | ✓                            | ✓                         | ✓                                          | ✗                                  | ✓                                | ✗             |                                                                                                                       |
| Kongpakwattana, 2019 | Thailand                                                                                                                       | ✓                            | ✓                         | ✓                                          | ✗                                  | ✗                                | ✓             | AD medications                                                                                                        |
| Koris, 2018          | Malaysia                                                                                                                       | ✓                            | ✓                         | ✓                                          | ✓                                  | ✗                                | ✗             | Alternative treatment                                                                                                 |
| Liu, 2013            | China, Cuba, Dominican Republic, India, Mexico, Peru, Venezuela                                                                | ✓                            | ✓                         | ✗                                          | ✗                                  | ✗                                | ✗             | Government primary care, hospital doctor, other government health worker, private doctor, dentist, traditional healer |
| Mould-Quevedo, 2013  | China                                                                                                                          | ✓                            | ✓                         | ✓                                          | ✗                                  | ✗                                | ✗             |                                                                                                                       |
| Nur, 2017            | Malaysia                                                                                                                       | ✓                            | ✓                         | ✓                                          | ✓                                  | ✓                                | ✗             |                                                                                                                       |
| Prada, 2017          | Colombia                                                                                                                       | ✓                            | ✓                         | ✓                                          | ✗                                  | ✗                                | ✓             |                                                                                                                       |
| Prince, 2004         | Argentina, Brazil, Chile, Cuba, Dominican Republic, Guatemala, Mexico, Panama, Peru, Uruguay, Venezuela, China, India, Nigeria | ✗                            | ✓                         | ✗                                          | ✗                                  | ✗                                | ✗             | Government primary care, government hospital, health worker, private doctor, dentist, traditional healer              |

| Author, year | Country   | Medications (general)/ drugs | Hospital stays/ inpatient | Outpatient visits/ consultation/ emergency | Diagnostic, examination, and tests | Rehabilitation/ physical therapy | out-of-pocket | Other components  |
|--------------|-----------|------------------------------|---------------------------|--------------------------------------------|------------------------------------|----------------------------------|---------------|-------------------|
| Rao, 2013    | India     | ✓                            | ✓                         | ✓                                          | ✓                                  | ×                                | ×             |                   |
| Rojas, 2011  | Argentina | ×                            | ✓                         | ✓                                          | ×                                  | ×                                | ×             | Ancillary studies |
| Wang, 2008   | China     | ✓                            | ✓                         | ✓                                          | ×                                  | ✓                                | ×             |                   |
| Wimo, 2006   | Worldwide | ×                            | ×                         | ×                                          | ×                                  | ×                                | ×             |                   |
| Wimo, 2007   | Worldwide | ×                            | ×                         | ×                                          | ×                                  | ×                                | ×             |                   |
| Wimo, 2010   | Worldwide | ×                            | ×                         | ×                                          | ×                                  | ×                                | ×             |                   |
| Wimo, 2013   | Worldwide | ×                            | ×                         | ×                                          | ×                                  | ×                                | ×             |                   |
| Wimo, 2017   | Worldwide | ×                            | ×                         | ×                                          | ×                                  | ×                                | ×             |                   |
| Xu, 2017     | China     | ✓                            | ✓                         | ✓                                          | ✓                                  | ×                                | ×             |                   |
| Yan, 2019    | China     | ✓                            | ✓                         | ✓                                          | ×                                  | ×                                | ✓             |                   |
| Zencir, 2005 | Turkey    | ✓                            | ×                         | ✓                                          | ×                                  | ×                                | ×             |                   |

**Table 4.** Direct non-medical cost components

| Author, year         | Country                                                                                                                        | Paid caregiver | Nursing home/ institutionalised/ accommodation | Transportations/ travel | Meals/ special food | Nappy | Equipment | Other components   |
|----------------------|--------------------------------------------------------------------------------------------------------------------------------|----------------|------------------------------------------------|-------------------------|---------------------|-------|-----------|--------------------|
| Aajami, 2019         | Iran                                                                                                                           | ×              | ✓                                              | ✓                       | ✓                   | ×     | ✓         |                    |
| Allegri, 2007        | Argentina                                                                                                                      | ✓              | ✓                                              | ×                       | ×                   | ×     | ×         |                    |
| Custodio, 2015       | Peru                                                                                                                           | ✓              | ×                                              | ×                       | ×                   | ✓     | ×         |                    |
| Ferreti, 2018        | Brazil                                                                                                                         | ×              | ×                                              | ✓                       | ×                   | ✓     | ×         |                    |
| Jia, 2018            | China                                                                                                                          | ×              | ✓                                              | ✓                       | ✓                   | ×     | ×         |                    |
| Keogh-Brown, 2015    | China                                                                                                                          | ✓              | ×                                              | ✓                       | ×                   | ×     | ✓         |                    |
| Kongpakwattana, 2019 | Thailand                                                                                                                       | ✓              | ×                                              | ✓                       | ×                   | ×     | ×         |                    |
| Koris, 2018          | Malaysia                                                                                                                       | ✓              | ×                                              | ✓                       | ✓                   | ×     | ×         |                    |
| Liu, 2013            | China, Cuba, Dominican Republic, India, Mexico, Peru, Venezuela                                                                | ×              | ×                                              | ✓                       | ×                   | ×     | ×         |                    |
| Mould-Quevedo, 2013  | China                                                                                                                          | ×              | ×                                              | ×                       | ×                   | ×     | ×         | Housekeeper cost   |
| Nur, 2017            | Malaysia                                                                                                                       | Not applicable |                                                |                         |                     |       |           |                    |
| Prada, 2017          | Colombia                                                                                                                       | Not applicable |                                                |                         |                     |       |           |                    |
| Prince, 2004         | Argentina, Brazil, Chile, Cuba, Dominican Republic, Guatemala, Mexico, Panama, Peru, Uruguay, Venezuela, China, India, Nigeria | ✓              | ×                                              | ×                       | ×                   | ×     | ×         |                    |
| Rao, 2013            | India                                                                                                                          | ✓              | ✓                                              | ✓                       | ✓                   | ×     | ×         | House modification |
| Rojas, 2011          | Argentina                                                                                                                      | ✓              | ×                                              | ×                       | ×                   | ×     | ×         |                    |
| Wang, 2008           | China                                                                                                                          | ✓              | ×                                              | ✓                       | ×                   | ×     | ✓         |                    |

| Author, year | Country   | Paid caregiver | Nursing home/ institutionalised/ accommodation | Transportations/ travel | Meals/ special food | Nappy | Equipment | Other components |
|--------------|-----------|----------------|------------------------------------------------|-------------------------|---------------------|-------|-----------|------------------|
| Wimo, 2006   | Worldwide | ×              | ×                                              | ×                       | ×                   | ×     | ×         |                  |
| Wimo, 2007   | Worldwide | ×              | ×                                              | ×                       | ×                   | ×     | ×         |                  |
| Wimo, 2010   | Worldwide | ×              | ×                                              | ×                       | ×                   | ×     | ×         |                  |
| Wimo, 2013   | Worldwide | ×              | ×                                              | ×                       | ×                   | ×     | ×         |                  |
| Wimo, 2017   | Worldwide | ×              | ×                                              | ×                       | ×                   | ×     | ×         |                  |
| Xu, 2017     | China     | ×              | ✓                                              | ✓                       | ×                   | ×     | ×         |                  |
| Yan, 2019    | China     | ×              | ✓                                              | ✓                       | ✓                   | ×     | ✓         |                  |
| Zencir, 2005 | Turkey    | Not applicable |                                                |                         |                     |       |           |                  |



**Table 5.** Indirect cost components reported by the included studies.

| Author, year         | Country                                                                                                                        | Productivity work loss of informal caregiver | Time spent on caregiving | Productivity work loss of patient | Health services for caregiver treatment | Other components |
|----------------------|--------------------------------------------------------------------------------------------------------------------------------|----------------------------------------------|--------------------------|-----------------------------------|-----------------------------------------|------------------|
| Aajami, 2019         | Iran                                                                                                                           | ✓                                            | ×                        | ×                                 | ×                                       |                  |
| Allegri, 2007        | Argentina                                                                                                                      | ×                                            | ✓                        | ×                                 | ×                                       |                  |
| Custodio, 2015       | Peru                                                                                                                           | ×                                            | ✓                        | ×                                 | ×                                       |                  |
| Ferreti, 2018        | Brazil                                                                                                                         | ✓                                            | ✓                        | ×                                 | ✓                                       |                  |
| Jia, 2018            | China                                                                                                                          | ✓                                            | ×                        | ✓                                 | ✓                                       |                  |
| Keogh-Brown, 2015    | China                                                                                                                          | ✓                                            | ✓                        | ×                                 | ×                                       |                  |
| Kongpakwattana, 2019 | Thailand                                                                                                                       | ×                                            | ✓                        | ×                                 | ×                                       |                  |
| Koris, 2018          | Malaysia                                                                                                                       | ×                                            | ✓                        | ×                                 | ×                                       |                  |
| Liu, 2013            | China, Cuba, Dominican Republic, India, Mexico, Peru, Venezuela                                                                | ×                                            | ✓                        | ×                                 | ×                                       |                  |
| Mould-Quevedo, 2013  | China                                                                                                                          | ✓                                            | ×                        | ×                                 | ×                                       |                  |
| Nur, 2017            | Malaysia                                                                                                                       | Not applicable                               |                          |                                   |                                         |                  |
| Prada, 2017          | Colombia                                                                                                                       | Not applicable                               |                          |                                   |                                         |                  |
| Prince, 2004         | Argentina, Brazil, Chile, Cuba, Dominican Republic, Guatemala, Mexico, Panama, Peru, Uruguay, Venezuela, China, India, Nigeria | ✓                                            | ×                        | ×                                 | ×                                       |                  |
| Rao, 2013            | India                                                                                                                          | ✓                                            | ✓                        | ×                                 | ×                                       |                  |
| Rojas, 2011          | Argentina                                                                                                                      | ×                                            | ×                        | ×                                 | ×                                       |                  |
| Wang, 2008           | China                                                                                                                          | ×                                            | ✓                        | ×                                 | ×                                       |                  |
| Wimo, 2006           | Worldwide                                                                                                                      | Not applicable                               |                          |                                   |                                         |                  |

| <b>Author, year</b> | <b>Country</b> | <b>Productivity work loss of informal caregiver</b> | <b>Time spent on caregiving</b> | <b>Productivity work loss of patient</b> | <b>Health services for caregiver treatment</b> | <b>Other components</b> |
|---------------------|----------------|-----------------------------------------------------|---------------------------------|------------------------------------------|------------------------------------------------|-------------------------|
| Wimo, 2007          | Worldwide      | x                                                   | ✓                               | x                                        | x                                              |                         |
| Wimo, 2010          | Worldwide      | x                                                   | ✓                               | x                                        | x                                              |                         |
| Wimo, 2013          | Worldwide      | x                                                   | ✓                               | x                                        | x                                              |                         |
| Wimo, 2017          | Worldwide      | x                                                   | ✓                               | x                                        | x                                              |                         |
| Xu, 2017            | China          | ✓                                                   | ✓                               | ✓                                        | x                                              |                         |
| Yan, 2019           | China          | ✓                                                   | x                               | ✓                                        | ✓                                              |                         |
| Zencir, 2005        | Turkey         | ✓                                                   | ✓                               | x                                        | x                                              |                         |

**Table 6.** The annual national cost of dementia as percentage of GDP of LMICs or region, inflated to year 2019.

| Study       | Country                | GDP 2019           | Direct Cost    | Indirect Cost   | Total Cost      | Direct Cost as % of GDP | Indirect Cost as % of GDP | Total Cost as % of GDP |
|-------------|------------------------|--------------------|----------------|-----------------|-----------------|-------------------------|---------------------------|------------------------|
| <b>UMIC</b> |                        |                    |                |                 |                 |                         |                           |                        |
| Wimo, 2010  | Albania                | 15,279,183,290     | 51,409,966     | 26,558,261      | 77,968,227      | 0.34                    | 0.17                      | 0.51                   |
| Wimo, 2010  | Algeria                | 171,091,289,782    | 319,088,207    | 104,065,071     | 423,153,278     | 0.19                    | 0.06                      | 0.25                   |
| Wimo, 2010  | Argentina              | 445,445,177,459    | 544,810,220    | 368,902,641     | 913,712,862     | 0.12                    | 0.08                      | 0.21                   |
| Wimo, 2010  | Armenia                | 13,672,802,158     | 55,155,186     | 23,562,464      | 78,717,650      | 0.40                    | 0.17                      | 0.58                   |
| Wimo, 2010  | Azerbaijan             | 48,047,647,059     | 82,119,058     | 53,177,384      | 135,296,442     | 0.17                    | 0.11                      | 0.28                   |
| Wimo, 2010  | Belarus                | 63,080,457,023     | 325,403,611    | 146,435,280     | 471,838,891     | 0.52                    | 0.23                      | 0.75                   |
| Wimo, 2010  | Belize                 | 1,879,613,600      | 3,552,335      | 2,925,452       | 6,477,787       | 0.19                    | 0.16                      | 0.34                   |
| Wimo, 2010  | Bosnia and Herzegovina | 20,164,193,807     | 80,613,887     | 133,724,212     | 214,338,098     | 0.40                    | 0.66                      | 1.06                   |
| Wimo, 2010  | Botswana               | 18,340,480,936     | 27,275,114     | 14,702,991      | 41,978,105      | 0.15                    | 0.08                      | 0.23                   |
| Wimo, 2010  | Brazil                 | 1,839,758,040,766  | 3,691,344,114  | 3,346,416,992   | 7,037,761,106   | 0.20                    | 0.18                      | 0.38                   |
| Wimo, 2010  | Bulgaria               | 68,558,815,112     | 444,034,193    | 194,129,295     | 638,069,113     | 0.65                    | 0.28                      | 0.93                   |
| Jia, 2018   | China                  | 14,343,000,000,000 | 93,915,262,557 | 101,220,946,303 | 195,136,208,860 | 0.65                    | 0.71                      | 1.36                   |
| Wimo, 2010  | Colombia               | 323,615,979,419    | 628,902,071    | 529,427,060     | 1,158,329,130   | 0.19                    | 0.16                      | 0.36                   |
| Wimo, 2010  | Costa Rica             | 61,801,385,049     | 198,943,971    | 124,124,028     | 323,067,999     | 0.32                    | 0.20                      | 0.52                   |

|             |                    |                   |               |               |               |      |      |      |
|-------------|--------------------|-------------------|---------------|---------------|---------------|------|------|------|
| Wimo, 2007  | Cuba               | 95,150,000,000    | 241,734,580   | 177,686,811   | 419,421,391   | 0.25 | 0.19 | 0.44 |
| Wimo, 2007  | Dominican Republic | 88,941,299,734    | 82,736,978    | 169,616,254   | 252,353,232   | 0.09 | 0.19 | 0.28 |
| Wimo, 2010  | Ecuador            | 107,435,665,000   | 179,205,912   | 187,561,999   | 366,767,911   | 0.17 | 0.17 | 0.34 |
| Wimo, 2010  | Equatorial Guinea  | 11,026,774,945    | 10,220,474    | 4,733,693     | 14,954,168    | 0.09 | 0.04 | 0.14 |
| Wimo, 2010  | Gabon              | 16,874,450,215    | 13,781,863    | 13,282,520    | 27,064,383    | 0.08 | 0.08 | 0.16 |
| Wimo, 2010  | Georgia            | 17,477,255,546    | 68,628,742    | 39,955,671    | 108,584,413   | 0.39 | 0.23 | 0.62 |
| Wimo, 2010  | Guatemala          | 76,710,355,347    | 144,495,613   | 165,272,760   | 309,768,373   | 0.19 | 0.22 | 0.40 |
| Wimo, 2010  | Guayana            | 5,173,759,528     | 8,960,330     | 9,549,826     | 18,510,156    | 0.17 | 0.18 | 0.36 |
| Wimo, 2010  | Iran               | 583,700,000,000   | 1,963,370,101 | 1,177,623,204 | 3,140,850,856 | 0.34 | 0.20 | 0.54 |
| Wimo, 2010  | Iraq               | 234,094,042,939   | 98,115,369    | 457,481,532   | 555,596,901   | 0.04 | 0.20 | 0.24 |
| Wimo, 2010  | Jordan             | 44,502,895,862    | 51,095,785    | 50,832,405    | 101,928,190   | 0.11 | 0.11 | 0.23 |
| Wimo, 2010  | Kazakhstan         | 181,665,908,556   | 146,372,178   | 69,049,572    | 215,421,750   | 0.08 | 0.04 | 0.12 |
| Wimo, 2010  | Lebanon            | 51,991,634,492    | 83,420,939    | 69,089,303    | 152,510,242   | 0.16 | 0.13 | 0.29 |
| Wimo, 2010  | Libya              | 52,091,152,228    | 237,089,261   | 139,391,709   | 376,234,259   | 0.46 | 0.27 | 0.72 |
| Koris, 2018 | Malaysia           | 364,681,367,532   | 212,462,032   | 1,912,158,302 | 2,124,620,335 | 0.06 | 0.52 | 0.58 |
| Wimo, 2010  | Maldives           | 5,642,179,170     | 2,404,762     | 1,311,688     | 3,716,450     | 0.04 | 0.02 | 0.07 |
| Wimo, 2010  | Mauritius          | 14,048,430,519    | 54,341,314    | 31,448,078    | 85,909,883    | 0.39 | 0.22 | 0.61 |
| Wimo, 2010  | Mexico             | 1,268,870,527,160 | 2,668,227,175 | 1,108,141,635 | 3,776,368,810 | 0.21 | 0.09 | 0.30 |

|              |                 |                   |               |               |                |      |      |      |
|--------------|-----------------|-------------------|---------------|---------------|----------------|------|------|------|
| Wimo, 2010   | Montenegro      | 5,542,577,965     | 9,344,893     | 6,031,704     | 15,461,550     | 0.17 | 0.11 | 0.28 |
| Wimo, 2010   | Namibia         | 12,366,528,259    | 18,469,639    | 5,863,377     | 24,235,293     | 0.15 | 0.05 | 0.20 |
| Wimo, 2010   | Paraguay        | 38,145,288,940    | 71,870,270    | 71,630,702    | 143,500,972    | 0.19 | 0.19 | 0.38 |
| Wimo, 2010   | Peru            | 226,848,050,820   | 383,114,880   | 331,866,427   | 714,981,307    | 0.17 | 0.15 | 0.32 |
| Wimo, 2010   | Russia          | 1,699,876,578,871 | 8,602,715,233 | 3,714,703,400 | 12,317,418,633 | 0.51 | 0.22 | 0.72 |
| Wimo, 2010   | Serbia          | 51,475,016,532    | 314,750,429   | 203,615,842   | 518,366,271    | 0.61 | 0.40 | 1.01 |
| Wimo, 2010   | South Africa    | 351,431,649,241   | 815,632,235   | 1,306,330,710 | 2,121,962,944  | 0.23 | 0.37 | 0.60 |
| Wimo, 2010   | Sri Lanka       | 84,008,783,756    | 328,369,104   | 12,323,137    | 446,926,180    | 0.39 | 0.01 | 0.53 |
| Wimo, 2010   | Suriname        | 3,697,371,950     | 8,234,763     | 11,250,310    | 19,485,073     | 0.22 | 0.30 | 0.53 |
| Wimo, 2010   | Thailand        | 543,548,969,969   | 1,546,075,473 | 264,609,810   | 818,237,070    | 0.28 | 0.05 | 0.15 |
| Wimo, 2010   | North Macedonia | 12,547,040,499    | 50,073,021    | 25,406,053    | 75,479,074     | 0.40 | 0.20 | 0.60 |
| Wimo, 2010   | Turkey          | 761,425,499,358   | 794,509,615   | 724,354,701   | 1,518,864,316  | 0.10 | 0.10 | 0.20 |
| Wimo, 2010   | Turkmenistan    | 40,761,000,000    | 86,893,692    | 46,580,717    | 133,474,409    | 0.21 | 0.11 | 0.33 |
| Wimo, 2010   | Venezuela       | 202,010,000,000   | 479,262       | 744,944       | 1,224,206      | 0.00 | 0.00 | 0.00 |
| Wimo, 2010   | Fiji            | 5,496,250,694     | 724,579       | 3,530,214     | 4,254,792      | 0.01 | 0.06 | 0.08 |
| <b>LRMIC</b> |                 |                   |               |               |                |      |      |      |
| Wimo, 2010   | Angola          | 88,815,697,793    | 41,494,010    | 31,120,508    | 72,614,518     | 0.05 | 0.04 | 0.08 |
| Wimo, 2010   | Bangladesh      | 302,571,254,131   | 591,927,746   | 704,214,550   | 1,295,983,475  | 0.20 | 0.23 | 0.43 |

|            |                                  |                   |               |               |               |      |      |      |
|------------|----------------------------------|-------------------|---------------|---------------|---------------|------|------|------|
| Wimo, 2010 | Bhutan                           | 2,530,547,158     | 4,428,117     | 3,075,082     | 7,503,199     | 0.17 | 0.12 | 0.30 |
| Wimo, 2010 | Bolivia                          | 40,895,322,844    | 63,942,499    | 131,591,809   | 195,534,307   | 0.16 | 0.32 | 0.48 |
| Wimo, 2010 | Cambodia                         | 27,089,389,787    | 51,531,731    | 64,921,865    | 116,453,596   | 0.19 | 0.24 | 0.43 |
| Wimo, 2010 | Cameroon                         | 39,007,354,359    | 43,016,607    | 37,615,419    | 80,632,026    | 0.11 | 0.10 | 0.21 |
| Wimo, 2010 | Cape verde                       | 1,981,845,740     | 3,849,640     | 1,283,213     | 5,132,853     | 0.19 | 0.06 | 0.26 |
| Wimo, 2010 | Comoros                          | 1,165,839,927     | 943,527       | 943,527       | 1,887,054     | 0.08 | 0.08 | 0.16 |
| Wimo, 2010 | Congo                            | 12,267,392,147    | 5,427,916     | 8,443,425     | 13,871,341    | 0.04 | 0.07 | 0.11 |
| Wimo, 2010 | Cote d'Ivoire                    | 58,539,424,930    | 26,569,920    | 76,717,243    | 103,377,845   | 0.05 | 0.13 | 0.18 |
| Wimo, 2010 | Democratic Republic of the Congo | 50,400,746,171    | 39,819,605    | 24,244,149    | 64,134,231    | 0.08 | 0.05 | 0.13 |
| Wimo, 2010 | Djibouti                         | 3,324,634,256     | 2,250,029     | 2,000,026     | 4,250,055     | 0.07 | 0.06 | 0.13 |
| Wimo, 2010 | East Timor/Timor Leste           | 2,017,924,900     | 2,327,877     | 3,569,412     | 5,897,289     | 0.12 | 0.18 | 0.29 |
| Wimo, 2010 | Egypt                            | 303,092,255,125   | 216,737,320   | 186,623,354   | 403,360,674   | 0.07 | 0.06 | 0.13 |
| Wimo, 2010 | El Salvador                      | 27,022,640,000    | 88,006,364    | 66,173,584    | 154,292,488   | 0.33 | 0.24 | 0.57 |
| Wimo, 2010 | Gaza Strip                       | 16,277,000,000    | 3,742,117     | 16,493,036    | 20,235,154    | 0.02 | 0.10 | 0.12 |
| Wimo, 2010 | Ghana                            | 66,983,634,224    | 70,323,423    | 142,566,940   | 212,890,363   | 0.10 | 0.21 | 0.32 |
| Wimo, 2010 | Honduras                         | 25,095,395,475    | 46,722,031    | 73,420,335    | 120,021,011   | 0.19 | 0.29 | 0.48 |
| Rao, 2013  | India                            | 2,875,000,000,000 | 3,238,636,795 | 3,455,906,311 | 6,694,543,106 | 0.11 | 0.12 | 0.23 |
| Wimo, 2010 | Indonesia                        | 1,119,190,780,753 | 2,206,416,654 | 1,818,312,365 | 4,024,729,018 | 0.20 | 0.16 | 0.36 |

|            |                     |                 |             |               |               |      |      |      |
|------------|---------------------|-----------------|-------------|---------------|---------------|------|------|------|
| Wimo, 2010 | Kenya               | 95,503,088,538  | 49,933,369  | 73,056,876    | 122,906,464   | 0.05 | 0.08 | 0.13 |
| Wimo, 2010 | Kyrgyzstan          | 8,454,619,608   | 25,625,801  | 26,452,439    | 52,078,240    | 0.30 | 0.31 | 0.62 |
| Wimo, 2010 | Laos                | 18,173,839,147  | 19,345,273  | 29,794,544    | 49,281,023    | 0.11 | 0.16 | 0.27 |
| Wimo, 2010 | Lesotho             | 2,376,328,637   | 6,619,996   | 58,634,254    | 12,483,422    | 0.28 | 2.47 | 0.53 |
| Wimo, 2010 | Mauretania          | 7,600,656,944   | 5,335,973   | 10,774,561    | 16,110,534    | 0.07 | 0.14 | 0.21 |
| Wimo, 2010 | Micronesia          | 410,000,000     | 495,634     | 758,028       | 1,253,662     | 0.12 | 0.18 | 0.31 |
| Wimo, 2010 | Mongolia            | 13,996,719,329  | 10,466,115  | 13,489,659    | 23,955,774    | 0.07 | 0.10 | 0.17 |
| Wimo, 2010 | Morocco             | 119,700,325,462 | 191,746,560 | 178,312,087   | 370,058,647   | 0.16 | 0.15 | 0.31 |
| Wimo, 2010 | Myanmar             | 76,085,852,617  | 1,871,748   | 381,935       | 2,253,018     | 0.00 | 0.00 | 0.00 |
| Wimo, 2010 | Nicaragua           | 12,520,915,291  | 43,735,668  | 62,494,581    | 106,230,248   | 0.35 | 0.50 | 0.85 |
| Wimo, 2010 | Nigeria             | 448,120,428,859 | 256,766,981 | 1,210,789,128 | 1,467,703,676 | 0.06 | 0.27 | 0.33 |
| Wimo, 2010 | Pakistan            | 278,221,906,023 | 835,693,815 | 884,476,264   | 1,720,170,079 | 0.30 | 0.32 | 0.62 |
| Wimo, 2010 | Philippines         | 376,795,508,679 | 653,600,908 | 397,881,720   | 1,051,606,463 | 0.17 | 0.11 | 0.28 |
| Wimo, 2010 | Republic of Moldova | 11,968,713,370  | 42,574,135  | 3,613,720     | 46,187,855    | 0.36 | 0.03 | 0.39 |
| Wimo, 2010 | Senegal             | 23,578,084,052  | 9,320,874   | 22,281,326    | 31,602,200    | 0.04 | 0.09 | 0.13 |
| Wimo, 2010 | Sudan               | 30,513,456,085  | 184,317,780 | 147,598,222   | 331,916,002   | 0.60 | 0.48 | 1.09 |
| Wimo, 2010 | Swaziland/Eswatini  | 4,471,598,727   | 6,031,284   | 12,369,244    | 18,400,529    | 0.13 | 0.28 | 0.41 |
| Wimo, 2010 | Tunisia             | 38,796,687,568  | 126,268,408 | 36,023,851    | 162,292,259   | 0.33 | 0.09 | 0.42 |

|            |                                        |                   |               |               |               |       |       |       |
|------------|----------------------------------------|-------------------|---------------|---------------|---------------|-------|-------|-------|
| Wimo, 2010 | Ukraine                                | 153,781,069,118   | 2,418,024,208 | 1,650,214,694 | 4,068,238,902 | 1.57  | 1.07  | 2.65  |
| Wimo, 2010 | Uzbekistan                             | 57,921,286,440    | 24,131,459    | 34,849,186    | 58,980,645    | 0.04  | 0.06  | 0.10  |
| Wimo, 2010 | Viet Nam                               | 261,921,244,843   | 973,293,555   | 701,083,364   | 2,003,831,896 | 0.37  | 0.27  | 0.77  |
| Wimo, 2010 | Western Sahara<br>(Morocco/Mauritania) | 119,700,325,462   | 93,947        | 1,221,316     | 1,315,263     | 0.00  | 0.00  | 0.00  |
| Wimo, 2010 | Zambia                                 | 23,309,773,923    | 11,078,665    | 28,462,261    | 39,450,856    | 0.05  | 0.12  | 0.17  |
| Wimo, 2010 | Zimbabwe                               | 21,440,758,800    | 14,124,603    | 38,259,435    | 52,384,038    | 0.07  | 0.18  | 0.24  |
| Wimo, 2011 | Vanuatu                                | 934,239,974       | 176,878       | 861,767       | 1,038,646     | 0.02  | 0.09  | 0.11  |
| Wimo, 2012 | Solomon Islands                        | 1,589,913,622     | 466,568       | 2,273,164     | 2,739,732     | 0.03  | 0.14  | 0.17  |
| Wimo, 2013 | Papua New Guinea                       | 24,829,107,011    | 6,452,060     | 31,435,038    | 37,887,098    | 0.03  | 0.13  | 0.15  |
| Wimo, 2014 | Western New Guinea<br>(Indonesia)      | 1,119,190,780,753 | 2,866,849     | 13,967,555    | 16,834,404    | 0.000 | 0.001 | 0.002 |
| <b>LIC</b> |                                        |                   |               |               |               |       |       |       |
| Wimo, 2010 | Afghanistan                            | 19,291,104,008    | 22,110,839    | 58,202,074    | 80,312,913    | 0.11  | 0.30  | 0.42  |
| Wimo, 2010 | Benin                                  | 14,390,709,095    | 7,628,770     | 28,607,888    | 36,236,658    | 0.05  | 0.20  | 0.25  |
| Wimo, 2010 | Burkina Faso                           | 15,990,803,570    | 7,595,445     | 25,807,251    | 33,402,697    | 0.05  | 0.16  | 0.21  |
| Wimo, 2010 | Burundi                                | 3,012,334,882     | 8,014,552     | 4,524,344     | 12,538,895    | 0.27  | 0.15  | 0.42  |
| Wimo, 2010 | Central African<br>Republic            | 2,220,307,369     | 16,865,565    | 25,947,023    | 42,812,588    | 0.76  | 1.17  | 1.93  |
| Wimo, 2010 | Chad                                   | 11,314,951,343    | 10,546,064    | 12,211,232    | 22,757,296    | 0.09  | 0.11  | 0.20  |



|            |                                       |                |             |             |             |      |      |      |
|------------|---------------------------------------|----------------|-------------|-------------|-------------|------|------|------|
| Wimo, 2010 | Democratic People's Republic of Korea | 17,396,000,000 | 16,278,770  | 53,975,922  | 70,254,692  | 0.09 | 0.31 | 0.40 |
| Wimo, 2010 | Eritrea                               | 6,500,000,000  | 13,022,511  | 27,100,901  | 40,123,412  | 0.20 | 0.42 | 0.62 |
| Wimo, 2010 | Ethiopia                              | 95,912,590,628 | 147,623,436 | 70,316,845  | 217,940,281 | 0.15 | 0.07 | 0.23 |
| Wimo, 2010 | Gambia                                | 1,826,073,740  | 1,834,891   | 5,118,381   | 6,953,272   | 0.10 | 0.28 | 0.38 |
| Wimo, 2010 | Guinea                                | 12,296,665,331 | 69,404,565  | 217,666,646 | 287,319,973 | 0.56 | 1.77 | 2.34 |
| Wimo, 2010 | Guinea-Bissau                         | 1,339,449,165  | 776,585     | 1,466,883   | 2,243,468   | 0.06 | 0.11 | 0.17 |
| Wimo, 2007 | Haiti                                 | 14,332,163,266 | 18,835,225  | 59,854,160  | 78,689,385  | 0.13 | 0.42 | 0.55 |
| Wimo, 2010 | Liberia                               | 3,070,518,100  | 2,838,633   | 123,480,551 | 15,186,688  | 0.09 | 4.02 | 0.49 |
| Wimo, 2010 | Madagascar                            | 14,114,631,281 | 20,248,451  | 51,709,754  | 72,067,068  | 0.14 | 0.37 | 0.51 |
| Wimo, 2010 | Malawi                                | 7,666,704,427  | 7,572,626   | 5,445,484   | 13,018,110  | 0.10 | 0.07 | 0.17 |
| Wimo, 2010 | Mali                                  | 17,279,566,719 | 6,441,445   | 23,648,046  | 30,001,253  | 0.04 | 0.14 | 0.17 |
| Wimo, 2010 | Mozambique                            | 15,291,448,212 | 29,037,810  | 31,382,478  | 60,420,288  | 0.19 | 0.21 | 0.40 |
| Wimo, 2010 | Nepal                                 | 30,641,380,604 | 84,997,386  | 116,693,735 | 201,691,121 | 0.28 | 0.38 | 0.66 |
| Wimo, 2010 | Niger                                 | 12,911,689,659 | 4,953,562   | 29,013,721  | 33,967,284  | 0.04 | 0.22 | 0.26 |
| Wimo, 2010 | Rwanda                                | 10,354,417,725 | 11,807,671  | 13,236,019  | 24,948,467  | 0.11 | 0.13 | 0.24 |
| Wimo, 2010 | Sierra Leone                          | 4,121,733,705  | 2,263,585   | 14,996,249  | 17,259,834  | 0.05 | 0.36 | 0.42 |
| Wimo, 2010 | Somalia                               | 7,700,000,000  | 7,960,785   | 22,866,086  | 30,996,250  | 0.10 | 0.30 | 0.40 |
| Wimo, 2010 | Syrian Arab Republic                  | 65,000,000,000 | 3,567,655   | 4,924,748   | 8,496,247   | 0.01 | 0.01 | 0.01 |

|            |                             |                |            |            |             |      |      |      |
|------------|-----------------------------|----------------|------------|------------|-------------|------|------|------|
| Wimo, 2010 | Tajikistan                  | 8,116,626,794  | 7,123,631  | 12,431,435 | 19,601,626  | 0.09 | 0.15 | 0.24 |
| Wimo, 2010 | Togo                        | 5,490,272,413  | 9,040,993  | 23,894,054 | 32,935,047  | 0.16 | 0.44 | 0.60 |
| Wimo, 2010 | Uganda                      | 35,165,157,017 | 40,533,169 | 38,848,416 | 79,480,688  | 0.12 | 0.11 | 0.23 |
| Wimo, 2010 | United Republic of Tanzania | 63,177,068,175 | 35,604,620 | 67,878,485 | 103,483,105 | 0.06 | 0.11 | 0.16 |
| Wimo, 2010 | Yemen                       | 22,581,081,994 | 20,735,253 | 67,460,585 | 88,195,838  | 0.09 | 0.30 | 0.39 |
